# Supplementary material for: Endemic Cyprus Scops Owl Otus cyprius Readily Breeds in Artificial Nest Boxes
Source: MDPI journal article supplement (doi:10.3390/ani11061775), 2021-06-14
Supplement: s1 [file s1]

Supplementary Materials

# Endemic Cyprus Scops Owl *Otus cyprius* Readily Breeds in Artificial Nest Boxes

Savvas Iezekiel <sup>1</sup>, Reuven Yosef <sup>2,\*</sup>, Constantinos Themistokleus <sup>3</sup>, Dimitrios E. Bakaloudis <sup>4</sup>, Christos G. Vlachos <sup>4</sup>, Andreas Antoniou <sup>5</sup>, Eandas Iezekiel <sup>5</sup>, Malamati A. Papakosta <sup>6</sup> and Jakub Z. Kosicki <sup>7</sup>

<sup>1</sup> Department of Forests, Ministry of Agriculture, Rural Development and Environment, 1414 Nicosia, Cyprus; iezekiel@cytanet.com.cy

<sup>2</sup> Ben Gurion University of the Negev—Eilat Campus, P. O. Box 272, 88000 Eilat, Israel

<sup>3</sup> Department of Forests, Ministry of Agriculture, Rural Development and Environment, Kedron 1 str., 86400, Panagia, Cyprus; cthemistokleous@fd.moa.gov.cy

<sup>4</sup> School of Forestry and Natural Environment, Aristotle University of Thessaloniki, P.O. Box 241, 541 24 Thessaloniki, Greece; debakaloudis@for.auth.gr (D.E.B.); cvlachos@for.auth.gr (C.G.V.);

<sup>5</sup> Cyprus Association for the Protection of Avifauna Ioanni Kapodistria 41A, 2321 Nicosia, Cyprus; andranton@gmail.com (A.A.); Eandas\_izekiel@hotmail.com (E.I.)

<sup>6</sup> Department of Forestry and Management of the Environment & Natural Resources, Democritus University of Thrace, 68200 Orestiada, Greece; mpapakos@fmenr.duth.gr

<sup>7</sup> Department of Avian Biology and Ecology, Faculty of Biology, Adam Mickiewicz University, Poznań, ul. Uniwersytetu Poznańskiego 6, 61-614 Poznań, Poland; kubako@amu.edu.pl

\* Correspondence: ryosef60@gmail.com; Tel.: +972-537671290

**Citation:** Iezekiel, S.; Yosef, R.; Themistokleus, C.; Bakaloudis, D.E.; Vlachos, C.G.; Antoniou, A.; Iezekiel, E.; Papakosta, M.A.; Kosicki, J.Z. Endemic Cyprus Scops Owl *Otus cyprius* Readily Breeds in Artificial Nest Boxes. **2021**, *11*, 1775. <https://doi.org/10.3390/ani11061775>

Academic Editor: Hermann Wagner

Received: 11 March 2021

Accepted: 11 June 2021

Published: 14 June 2021

**Publisher's Note:** MDPI stays neutral with regard to jurisdictional claims in published maps and institutional affiliations.

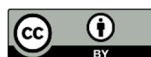

**Copyright:** © 2021 by the authors. Submitted for possible open access publication under the terms and conditions of the Creative Commons Attribution (CC BY) license (<http://creativecommons.org/licenses/by/4.0/>).

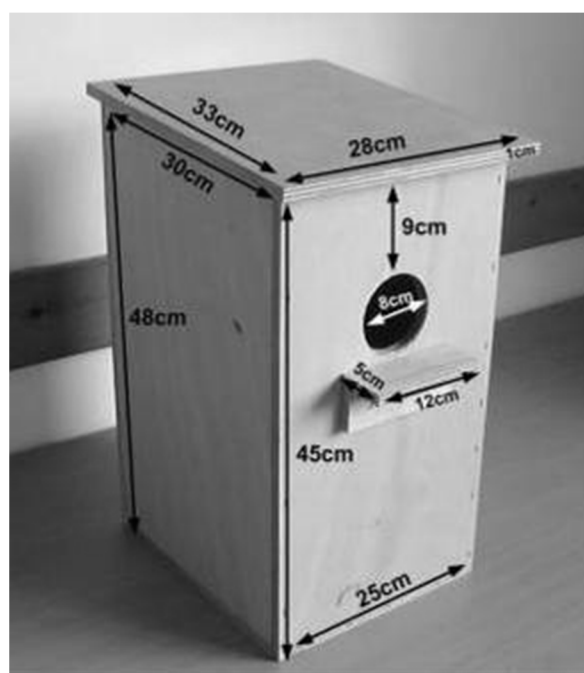

**Figure S1.** Nest box photograph provided to Cyprus Scops Owl *Otus cyprius* in Paphos Forest (Cyprus) showing exact dimensions.
